# Supplementary material
Source: HighWire-hosted journal article supplement (doi:10.1101/rna.056572.116)
Supplement: Supplemental_Fig_2.docx [file Supplemental_Fig_2.docx]

**Supplementary figure 2**

*rps1* Liverwort *Marchantia polymorpha*
 M S F S Q L F P K Y N S S
 ATG AGC TTT AGT CAA TTA TTT CCC A AA TAT AAT TCT AGT

*rps1* Moss *Physcomitrella patens*
 M S F T Q L F P Q Y N S S
 ATG AGC TTT ACT CAA CTA TTT CCC C AA TAT AAT TCT AGT

*rps1* Fern *Gleichenia dicarpa*
 M S F G Q L F P T H N P S
 ATG AGC TTT GGT CAA TTA TTC CCC A**|**CG CAT AAT CCT AGT
 **i25**

*GTG CAA AGT AGA TCG TAC ACC TTC C****|****AC TCA TAT ATT AGC
 V Q S R S Y T F H S Y I S
hypothetical frameshift rpl2 > rps1*

↑ ?

*rpl2* Fern *Gleichenia dicarpa* **i846**
GCG TGC AAA GTA GAT CGT ACA CCT TCC**|**ACT CAT ATA TTA GCT
 A C K V D R T P S T H I L A

*rpl2* Moss *Physcomitrella patens*
GCG GGC AAA GTA GAT CGT GCA CCT TTC ACT TAT ATA TTA GCT
 A G K V D R A P F T Y I L A

*rpl2* Liverwort *Marchantia polymorpha*CGA GTG CTA CGC ACC TCC GAG CCT TTC ACT TAT ATT TTA GCC
 R V L R T S E P F T Y I L A

**Supplementary Figure 2.** The aminoterminus of *rps1* around the fern intron rps1i25g2 insertion site (vertical line) is highly conserved between the fern *Gleichenia dicarpa*, the moss *Physcomitrella patens,* and the liverwort *Marchantia polymorpha* (top section). In contrast, it is highly different from the respective *rpl2* regions upstream of the intron rpl2i846g2 insertion site (vertical line, bottom section), both on amino acid level as well as on nucleotide level or after assuming the necessary frameshift for transformation of rpl2i846g2 into rps1i25g2 (middle section, italics).
