# Supplementary material
Source: HighWire-hosted journal article supplement (doi:10.1101/rna.056572.116)
Supplement: Supplemental_Fig_3.docx [file Supplemental_Fig_3.docx]

**Supplementary figure**
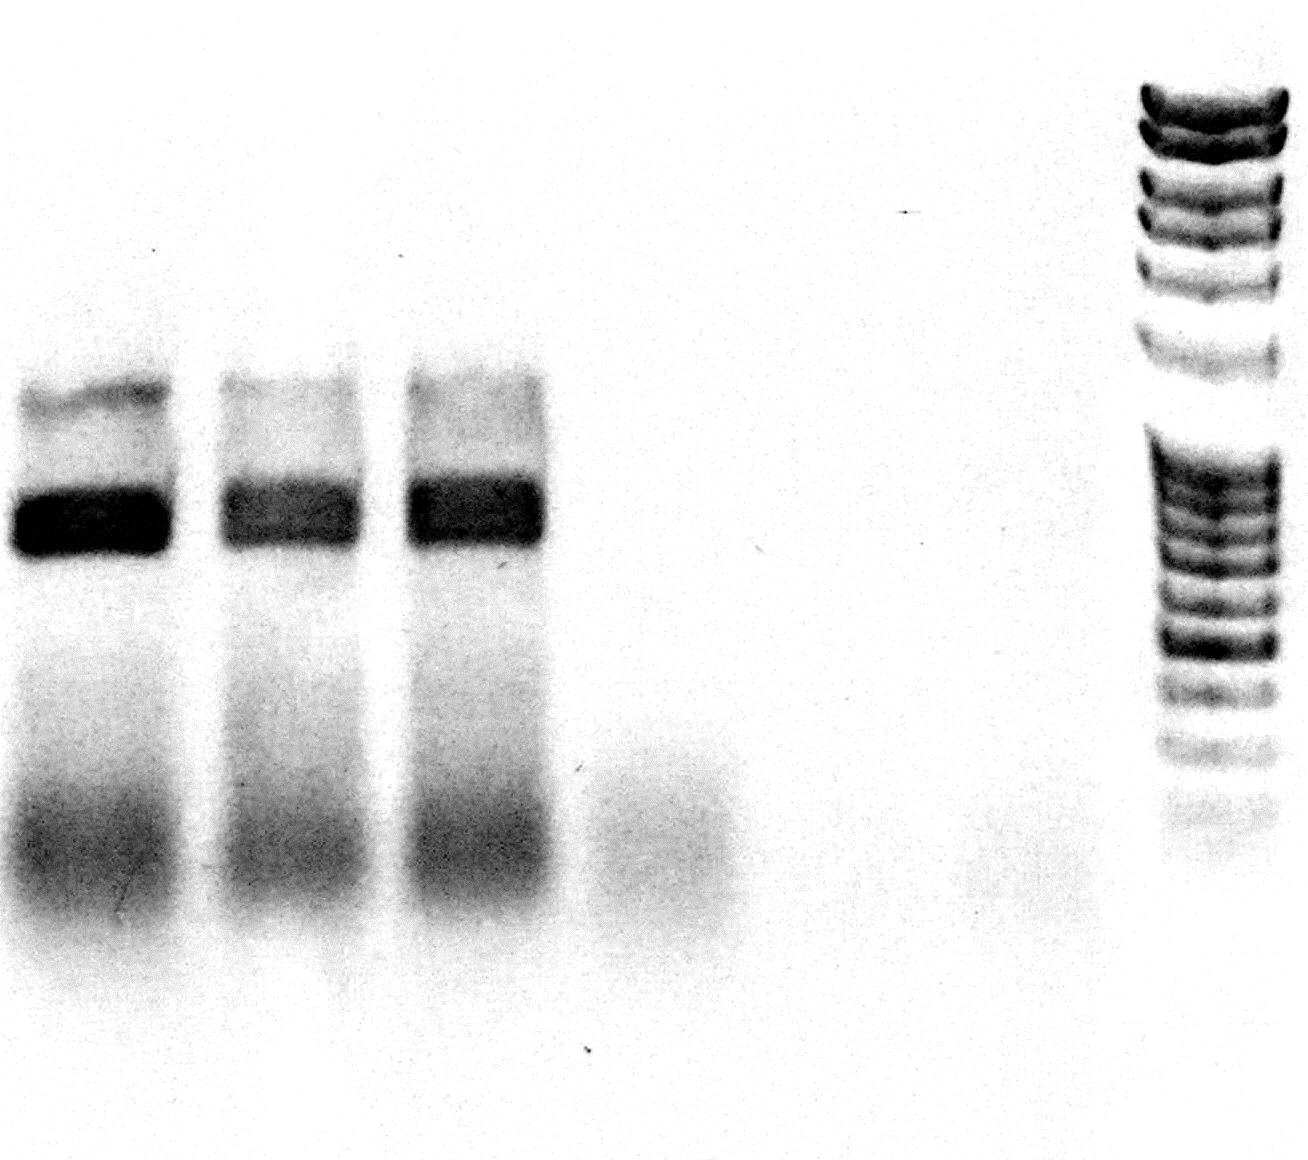
**3**

**1500 bp**

**500 bp**

**1000 bp**

**57 °C 59 °C 61 °C -RT H20 DNA**

**Supplementary figure 3.** PCR amplification of the spliced out and retrotranscribed rpl2i846g2 lariat of *Anemia phyllitidis*. The RT-PCR was performed with three different annealing temperatures. As negative controls samples without Maxima Reverse Transcriptase (-RT), water instead of template (H2O) and with DNA as template were used. Negative controls were incubated at 59°C annealing temperature.
