# Supplementary material
Source: HighWire-hosted journal article supplement (doi:10.1101/rna.056572.116)
Supplement: Supplemental_Table_S1.docx [file Supplemental_Table_S1.docx]

**Supplementary Table 1. List of experimentally verified RNA editing sites.**

The intronal RNA editing sites were analyzed either through a cDNA analysis of premature and unspliced mRNAs (1) or through a new method of lariat-specific cDNA synthesis (2) (see also materials and methods). Extending the usual nomenclature (Rüdinger et al. 2009) the intronal editing sites are named after the intron name, the type of RNA editing (eU for C-to-U and eC for U-to-C editing) and the intron nucleotide position. In most clones the cDNA is only partially edited.

| **Species** | **clone name** | **Gene** | **Intronal RNA editing sites** | **Method** |
| --- | --- | --- | --- | --- |
| *Gleichenia dicarpa* | intronup1 | *rpl2* | rpl2i846g2eU433, rpl2i846g2eU491, rpl2i846g2eU492 | 1 |
| *Gleichenia dicarpa* | intronup2 | *rpl2* | rpl2i846g2eU433, rpl2i846g2eU491, rpl2i846g2eU512, rpl2i846g2eU681, rpl2i846g2eU686, rpl2i846g2eU725 | 1 |
| *Gleichenia dicarpa* | intronup3 | *rpl2* | rpl2i846g2eU433, rpl2i846g2eU491, rpl2i846g2eU512, rpl2i846g2eU681, rpl2i846g2eU686, rpl2i846g2eU725 | 1 |
| *Gleichenia dicarpa* | intronup4 | *rpl2* | rpl2i846g2eU433, rpl2i846g2eU491, rpl2i846g2eU492 | 1 |
| *Gleichenia dicarpa* | intronup5 | *rpl2* | rpl2i846g2eU433, rpl2i846g2eU491, rpl2i846g2eU512, rpl2i846g2eU681, rpl2i846g2eU686, rpl2i846g2eU725 | 1 |
| *Gleichenia dicarpa* | introndo1 | *rpl2* | rpl2i846g2eU433, rpl2i846g2eU491, rpl2i846g2eU492, rpl2i846g2eU512, rpl2i846g2eU681 | 1 |
| *Polypodium cambricum* | intronup1 | *rpl2* | rpl2i846g2eU225 | 1 |
| *Polypodium cambricum* | introndo1 | *rpl2* | rpl2i846g2eU225, rpl2i846g2eU565 | 1 |
| *Dicksonia antarctica* | intronup1 | *rpl2* | rpl2i846g2eU725 | 1 |
| *Dicksonia antarctica* | introndo1 | *rpl2* | rpl2i846g2eU512 | 1 |
| *Dicksonia antarctica* | lariat | *rpl2* | rpl2i846g2eU512, rpl2i846g2eU635 | 2 |
| *Azolla filiculoides* | intronup1 | *rpl2* | rpl2i846g2eU178, rpl2i846g2eU540 | 1 |
| *Azolla filiculoides* | introndo1 | *rpl2* | rpl2i846g2eU32, rpl2i846g2eU178 | 1 |
| *Anemia phyllitidis* | intronup1 | *rpl2* | rpl2i846g2eU94, rpl2i846g2eU97, rpl2i846g2eU149, rpl2i846g2eU193, rpl2i846g2eC266, rpl2i846g2eC364, rpl2i846g2eC564, rpl2i846g2eC582, rpl2i846g2eU628 | 1 |
| *Anemia phyllitidis* | introndo1 | *rpl2* | rpl2i846g2eU94, rpl2i846g2eU97, rpl2i846g2eU132, rpl2i846g2eU193, rpl2i846g2eC266, rpl2i846g2eC364, rpl2i846g2eU557, rpl2i846g2eC564, rpl2i846g2eC582, rpl2i846g2eU628, rpl2i846g2eC672 | 1 |
| *Anemia phyllitidis* | lariat1 | *rpl2* | rpl2i846g2eU94, rpl2i846g2eU97, rpl2i846g2eU193, rpl2i846g2eC266, rpl2i846g2eC364, rpl2i846g2eC564, rpl2i846g2eC582, rpl2i846g2eU628, rpl2i846g2eC672, rpl2i846g2eU676, rpl2i846g2eC690, rpl2i846g2eU695 | 2 |
| *Anemia phyllitidis* | lariat2 | *rpl2* | rpl2i846g2eU94, rpl2i846g2eU97, rpl2i846g2eU193, rpl2i846g2eC266, rpl2i846g2eC364, rpl2i846g2eC564, rpl2i846g2eC582, rpl2i846g2eU628, rpl2i846g2eC672, rpl2i846g2eU676, rpl2i846g2eC690 | 2 |
| *Anemia phyllitidis* | lariat3 | *rpl2* | rpl2i846g2eU94, rpl2i846g2eU97, rpl2i846g2eU193, rpl2i846g2eC266, rpl2i846g2eC364, rpl2i846g2eU375, rpl2i846g2eC564, rpl2i846g2eC582, rpl2i846g2eC588, rpl2i846g2eU628, rpl2i846g2eC672, rpl2i846g2eC690 | 2 |
| *Anemia phyllitidis* | lariat4 | *rpl2* | rpl2i846g2eU193, rpl2i846g2eC266, rpl2i846g2eC364, rpl2i846g2eC564, rpl2i846g2eC582, rpl2i846g2eU628, rpl2i846g2eC672, rpl2i846g2eU676, rpl2i846g2eC690 | 2 |
| *Vandenboschia radicans* | intronup1 | *rpl2* | rpl2i846g2eU32, rpl2i846g2eC334 | 1 |
| *Vandenboschia radicans* | introndo1 | *rpl2* | rpl2i846g2eC334 | 1 |
| *Todea barbara* | intronup1 | *rpl2* | rpl2i846g2eU491, rpl2i846g2eU523, rpl2i846g2eU570 | 1 |
| *Todea barbara* | introndo1 | *rpl2* | rpl2i846g2eU32, rpl2i846g2eU491, rpl2i846g2eU523, rpl2i846g2eU570, rpl2i846g2eU583 | 1 |
| *Angiopteris mada.* | intronup1 | *rpl2* | rpl2i846g2eU334, rpl2i846g2eU419, rpl2i846g2eU556, rpl2i846g2eU695 | 1 |
| *Psilotum nudum* | intronup1 | *rpl2* | rpl2i846g2eU392, rpl2i846g2eU553 | 1 |
| *Psilotum nudum* | introndo1 | *rpl2* | rpl2i846g2eU553, rpl2i846g2eU585 | 1 |
| *Gleichenia dicarpa* | intronup1 | *rps1* | rps1i25g2eC61, rps1i25g2eU141, rps1i25g2eU232, rps1i25g2eC553, rps1i25g2eU625, rps1i25g2eU695, rps1i25g2eU723 | 1 |
| *Gleichenia dicarpa* | intronup2 | *rps1* | rps1i25g2eC61, rps1i25g2eU141, rps1i25g2eU723 | 1 |
| *Gleichenia dicarpa* | intronup3 | *rps1* | rps1i25g2eC61, rps1i25g2eU141 | 1 |
| *Gleichenia dicarpa* | introndo1 | *rps1* | rps1i25g2eU57, rps1i25g2eC61, rps1i25g2eU76, rps1i25g2eU141, rps1i25g2eC209, rps1i25g2eU637, rps1i25g2eU695, rps1i25g2eU723 | 1 |
| *Gleichenia dicarpa* | introndo2 | *rps1* | rps1i25g2eC52, rps1i25g2eU57, rps1i25g2eC61, rps1i25g2eU141, rps1i25g2eU156, rps1i25g2eU232, rps1i25g2eU695, rps1i25g2eU723 | 1 |
| *Gleichenia dicarpa* | introndo3 | *rps1* | rps1i25g2eU40, rps1i25g2eU57, rps1i25g2eC61, rps1i25g2eU76, rps1i25g2eU141, rps1i25g2eU723 | 1 |
| *Gleichenia dicarpa* | introndo4 | *rps1* | rps1i25g2eU57, rps1i25g2eC61, rps1i25g2eU76, rps1i25g2eU141, rps1i25g2eU156, rps1i25g2eU182, rps1i25g2eU695 | 1 |
| *Polypodium cambricum* | intronup1 | *rps1* | rps1i25g2eU595, rps1i25g2eU663, rps1i25g2eU673 | 1 |
| *Polypodium cambricum* | introndo1 | *rps1* | rps1i25g2eU663 | 1 |
| *Polypodium cambricum* | lariat1 | *rps1* | rps1i25g2eU595, rps1i25g2eU663 | 2 |
| *Dicksonia antarctica* | intronup1 | *rps1* | rps1i25g2eU590 | 1 |
| *Dicksonia antarctica* | lariat1 | *rps1* | rps1i25g2eU527, rps1i25g2eU590, rps1i25g2eU693 | 2 |
| *Dicksonia antarctica* | lariat2 | *rps1* | rps1i25g2eU527, rps1i25g2eU590, rps1i25g2eU693 | 2 |
| *Azolla filiculoides* | intronup1 | *rps1* | rps1i25g2eU531, rps1i25g2eU578, rps1i25g2eU597, rps1i25g2eU683 | 1 |
| *Azolla filiculoides* | introndo1 | *rps1* | rps1i25g2eC380, rps1i25g2eU771, rps1i25g2eC779 | 1 |
| *Anemia phyllitidis* | intronup1 | *rps1* | rps1i25g2eU84, rps1i25g2eU209, rps1i25g2eC211 | 1 |
| *Anemia phyllitidis* | lariat1 | *rps1* | rps1i25g2eU209, rps1i25g2eC211 | 2 |
| *Vandenboschia radicans* | intronup1 | *rps1* | rps1i25g2eU728 | 1 |
| *Vandenboschia radicans* | introndo1 | *rps1* | rps1i25g2eU16, rps1i25g2eC409 | 1 |
| *Todea barbara* | intronup1 | *rps1* | rps1i25g2eU723 | 1 |
| *Todea barbara* | introndo1 | *rps1* | rps1i25g2eC443, rps1i25g2eU723 | 1 |
| *Angiopteris mada.* | intronup1 | *rps1* | no edits | 1 |
| *Angiopteris mada.* | introndo1 | *rps1* | rps1i25g2eU16 | 1 |
| *Psilotum nudum* | intronup1 | *rps1* | rps1i25g2eU363, rps1i25g2eC432, rps1i25g2eU597, rps1i25g2eU656, rps1i25g2eU736 | 1 |
| *Psilotum nudum* | introndo1 | *rps1* | rps1i25g2eU363, rps1i25g2eU597, rps1i25g2eU656 | 1 |
