# Supplementary material
Source: HighWire-hosted journal article supplement (doi:10.1101/rna.056572.116)
Supplement: Supplemental_Table_S2.docx [file Supplemental_Table_S2.docx]

**Supplementary Table 2. Oligonucleotide primer sequences.**

All primers which were used in this study and their respective sources are listed below. Primers with the ending -up or -do are forward or reverse primer, respectively. Primers with the ending -lariat were used for the lariat-specific cDNA synthesis and the downstream RT-PCR. Standard monilophyte primer can be used for all monilophytes but it is strongly recommended to use a more specific primer, e.g. rpl2i846Equido, if listed. For further information about primer and amplifying conditions please contact the corresponding author.

| **Primer names** | **Primer sequence (5´-3´)** | **Target gene/intron** | **Target taxon** | **Source** |
| --- | --- | --- | --- | --- |
| rps1i25up | AYGAGCTTTGGTYAAYTATTYCC | *rps1* | standard monilophyte primer | This study |
| rps1i25do | CCYGCGRTKGCYACNRMATAMCCWCCYTT | *rps1* | standard monilophyte primer | This study |
| rps1i25do2 | TTGGTTRGTTCAATCCRAA | *rps1* | standard monilophyte primer | This study |
| rps1i25intronup | GCYCRCGCTACTARTRACG | partial rps1i25g2 | standard monilophyte primer | This study |
| rps1i25editdo | AAATCTYGGTTAGTTCAATCCA | partial rps1i25g2 | standard monilophyte primer | This study |
| rps1i25introndo | ATTRCTGCWTAAGCTYGGCTC | partial rps1i25g2 | standard monilophyte primer | This study |
| rps1i25lariat | GRCYAACRGATCRCACTAAGCTCYG | rps1i25g2 lariat | standard monilophyte primer | This study |
| rps1i25lariatAnemia | CAACAGATCACACTAGGCTTTAGCATTGC | rps1i25g2 lariat | *Anemia* | This study |
| rps1i25lariatAzolla | TAACAGATCACACTAAGCCGCACCATTAC | rps1i25g2 lariat | *Azolla* | This study |
| rps1i25lariatup | AACGRCYCRCGCTAYTARTRACG | rps1i25g2 lariat | standard monilophyte primer | This study |
| rpl2i846up | GGCGTATTACKGTTTTTCACC | *rpl2* | standard monilophyte primer | (Knie et al. 2015) |
| rpl2i846do | CRAGGTGACACCGAAGGTCT | *rpl2* | standard monilophyte primer | (Knie et al. 2015) |
| rpl2i846PCSdo | CTAATTTCTGCGYTTYCTTACTAC | *rpl2* | core leptosporangiates | (Knie et al. 2015) |
| rpl2i846Equido | ATTCATAGCMACACCYCRAAC | *rpl2* | Equisetales | (Knie et al. 2015) |
| rpl2i846intronup | ATGTMTTTYGCRAAGCGAC | partial rpl2i846g2 | standard monilophyte primer | This study |
| rpl2i846editdo | CCYCTAGCYATATGGGCYA | partial rpl2i846g2 | standard monilophyte primer | This study |
| rpl2i846introndo | CTYGGCTYCCRAACCGTRC | partial rpl2i846g2 | standard monilophyte primer | This study |
| rpl2i846editup | CGTTCYTCYYGGATTGCTTT | partial rpl2i846g2 | standard monilophyte primer | This study |
| rpl2i846lariat | ACCAACRGGTCRCACTARGCCGC | rpl2i846g2 lariat | standard monilophyte primer | This study |
| rpl2i846lariatAnemia | AACGGGTCACACTAAACCACACTATTAC | rpl2i846g2 lariat | *Anemia* | This study |
| rpl2i846lariatup | GCAACGAGAAYTTYGABCRGATG | rpl2i846g2 lariat | standard monilophyte primer | This study |
